# Supplementary material for: Dense energetic salts of N,N′-dinitrourea (DNU)
Source: Royal Society of Chemistry journal article supplement (doi:10.1039/b712417a), 2008-01-01
Supplement: b712417a.pdf [file b712417a.pdf]

Supplementary Material (ESI) for New Journal of Chemistry  
This journal is (c) The Royal Society of Chemistry and  
The Centre National de la Recherche Scientifique, 2007

## Supporting Information

### Structure and Synthesis of Energetic Salts of N,N'-dinitrourea (DNU)

Chengfeng Ye, Haixiang Gao, Brendan Twamley and Jean'ne M. Shreeve\*

Department of Chemistry, University of Idaho, Moscow, Idaho 83844-2343, USA

E-mail: [jshreeve@uidaho.edu](mailto:jshreeve@uidaho.edu)

S2 Table 1 G3 enthalpy ( $H_{298}(G3)$ ), experimental & calculated heats of formation of energetic salts.

S3 Table 2 G3MP2 enthalpy ( $H_{298}(G3MP2)$ ), experimental & calculated heats of formation of energetic salts.

Table 1 G3 enthalpy ( $H_{298}(\text{G3})$ ), experimental & calculated heats of formation of

| Species                                                              | $H_{298}(\text{G3})^a$ | $\Delta H_f^{\text{Exp.}}^b$<br>(KJ/mol) | $\Delta H_f^{\text{calcd.}}^c$<br>(KJ/mol) | energ<br>etic<br>salts. |
|----------------------------------------------------------------------|------------------------|------------------------------------------|--------------------------------------------|-------------------------|
| CH4                                                                  | -40.45381              | -74.87                                   |                                            |                         |
| C2H6                                                                 | -79.71891              | -83.80                                   |                                            |                         |
| CH2=CH2                                                              | -78.50342              | 52.47                                    |                                            |                         |
| CH2=NH                                                               | -94.55099              |                                          | 89.87                                      |                         |
| CH3NH2                                                               | -95.75573              | -23.01                                   |                                            |                         |
| CH3NH3                                                               | -96.09702              | 609.10                                   |                                            |                         |
| CH3(+) <sup>(1P)</sup>                                               | -39.42678              | 1101.79                                  |                                            |                         |
| NH3                                                                  | -56.50321              | -45.94                                   |                                            |                         |
| HN=NH (cis)                                                          | -110.56042             |                                          | 228.28                                     |                         |
| H2NNH2                                                               | -111.77104             | 95.35                                    |                                            |                         |
| tetrazole                                                            | -258.09848             | 334.50                                   |                                            |                         |
| imidazole                                                            | -226.05312             | 132.90                                   |                                            |                         |
| 1,2,3-triazole                                                       | -242.06394             |                                          | 271.75                                     |                         |
| 1,2,4-triazole                                                       | -242.09155             |                                          | 192.88                                     |                         |
| 1,2,4-triazolium (+)                                                 | -242.42750             | 836.80                                   |                                            |                         |
| 4-amino-1,2,4-triazole                                               | -297.36005             |                                          | 329.62                                     |                         |
| 1-methyl-4-amino-1,2,4-triazolium (+)                                | -336.98644             |                                          | 907.30                                     |                         |
| 4-amino-1,2,4-triazolium (+)                                         | -297.70886             |                                          | 937.80                                     |                         |
| 3-amino-1,2,4-triazolium (+)                                         | -297.76331             |                                          | 799.41                                     |                         |
| 3,5-diamino-1,2,4-triazolium (+)                                     | -353.09837             |                                          | 763.99                                     |                         |
| NH <sub>3</sub> CH <sub>2</sub> CH <sub>2</sub> NH <sub>3</sub> (2+) | -190.87608             |                                          | 1622.76                                    |                         |
| guanidine                                                            | -205.22077             |                                          | 19.96                                      |                         |
| guanidinium (+)                                                      | -205.59560             |                                          | 563.74                                     |                         |
| aminoguanidinium (+)                                                 | -260.88051             |                                          | 660.18                                     |                         |

<sup>a</sup> G3 enthalpy calculated using Gaussian 03, unit in Hartree, <sup>b</sup> from NIST webbook, webbook.nist.gov. <sup>c</sup> calculated value using atomization or isodesmic reactions.

Supplementary Material (ESI) for New Journal of Chemistry  
This journal is (c) The Royal Society of Chemistry and  
The Centre National de la Recherche Scientifique, 2007

Table 2 G3MP2 enthalpy ( $H_{298}(\text{G3MP2})$ ), experimental & calculated heats of formation of energetic salts.

| Species                             | $H_{298}(\text{G3MP2})^a$ | $\Delta H_f^{\text{Exp. } b}$<br>(KJ/mol) | $\Delta H_f^{\text{iso. } c}$<br>(KJ/mol) |
|-------------------------------------|---------------------------|-------------------------------------------|-------------------------------------------|
| CH <sub>4</sub>                     | -40.41828                 | -74.87                                    |                                           |
| NH <sub>3</sub>                     | -56.45954                 | -45.94                                    |                                           |
| NH <sub>2</sub> (-)                 | -55.824397                | 111.78                                    |                                           |
| NH <sub>2</sub> NH <sub>2</sub>     | -111.695401               | 95.35                                     |                                           |
| CH <sub>3</sub> NH <sub>2</sub>     | -95.681770                | -22.5                                     |                                           |
| HNO <sub>2</sub>                    | -205.477367               | -76.73                                    |                                           |
| NH <sub>2</sub> (CO)NH <sub>2</sub> | -224.963117               | -235.50                                   |                                           |
| Urea(-)                             | -224.386855               | -251.58                                   |                                           |
| Dinitrourea (DNU)                   | -633.455494               |                                           | 24.88                                     |
| DNU(-)                              | -632.965488               |                                           | -198.46                                   |
| DNU(2-)                             | -632.302877               |                                           | 31.38                                     |
| 1,2,4-triazolium(+)                 | -242.234752               | 836.78                                    |                                           |
| 3,4,5-triamino-1,2,4-triazolium(+)  | -408.075774               |                                           | 877.55                                    |

<sup>a</sup> G3 enthalpy calculated using Gaussian 03, unit in Hartree, <sup>b</sup> from NIST webbook, [webbook.nist.gov](http://webbook.nist.gov). <sup>c</sup> calculated value using atomization or isodesmic reactions.
